# Supplementary material
Source: Springer Nature journal article supplement (https://www.springermedizin.de/resource/supplementary/12887_2011_546_MOESM2_ESM.pdf/9475482)
Supplement: MOESM2 [file 9475482]

Recruitment: premature infants  $\leq 32$  weeks

Baseline Measurement at 34 weeks: TIMPSI

Randomization

Intervention Group:  
parents of 8 infants

Standard Follow-Up:  
parents of 8 infants

At 34 week: Observation X 3  
At 35 week: Observation X 1

At 37 week:  
Semi-structured Interviews

At 3 months corrected age:  
Semi-structured Interviews

At 6 months corrected age:  
Semi-structured Interviews

At 12 months corrected age:  
Semi-structured Interviews

At 24 months corrected age:  
Semi-structured Interviews
